# Supplementary material for: Monocytes with angiogenic potential are selectively induced by liver resection and accumulate near the site of liver regeneration
Source: PubMed Central journal article supplement (PMC4223854; doi:10.1186/s12865-014-0050-3), 2014-10-30

**A**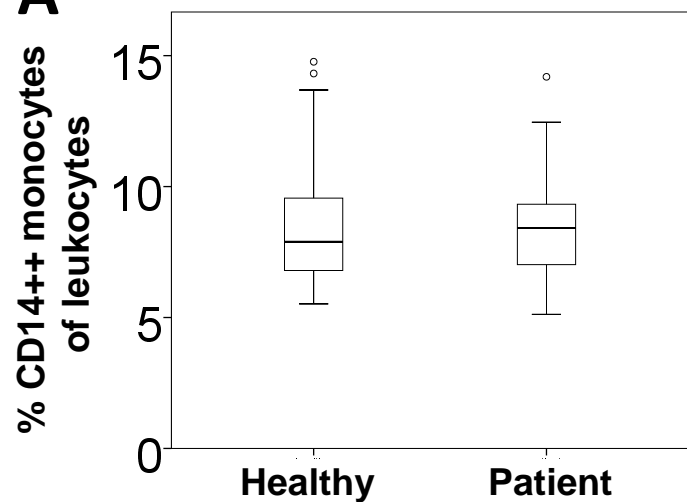**B**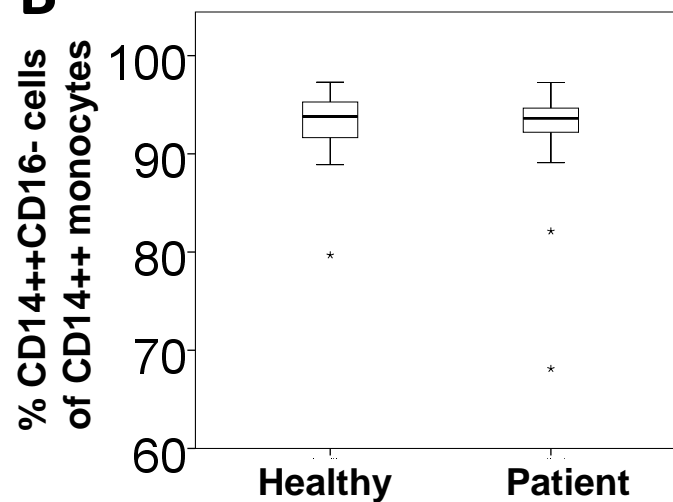**C**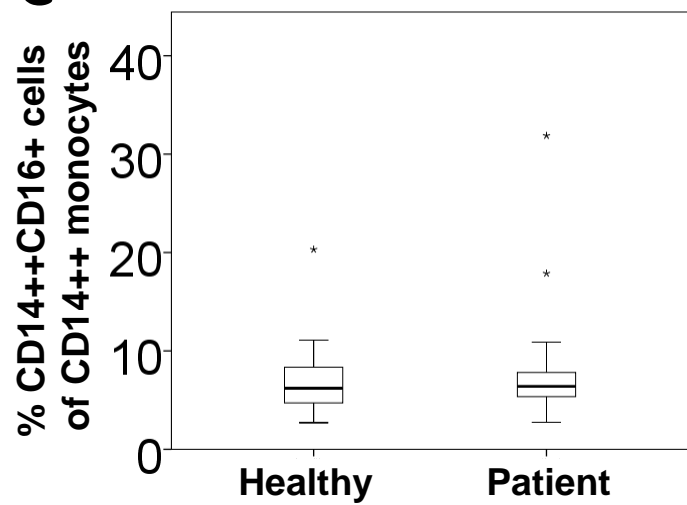**D**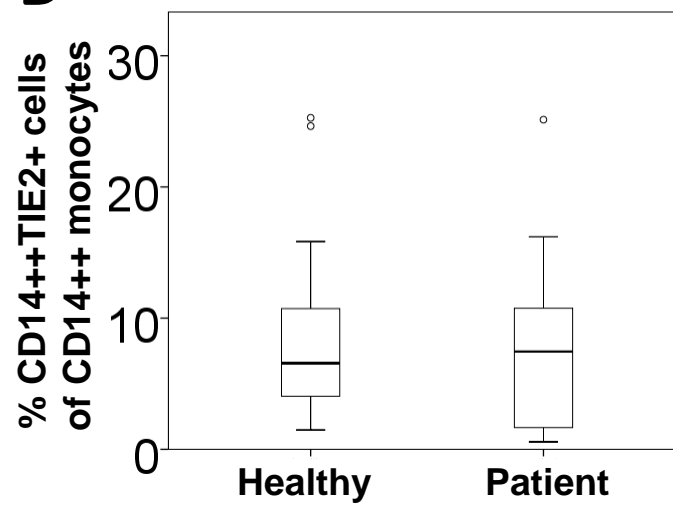

Supplement: 12865_2014_50_MOESM2_ESM.pdf [file 12865_2014_50_MOESM2_ESM.pdf]
