# Supplementary material for: Monocytes with angiogenic potential are selectively induced by liver resection and accumulate near the site of liver regeneration
Source: Springer Nature journal article supplement (doi:10.1186/s12865-014-0050-3), 2014-10-29

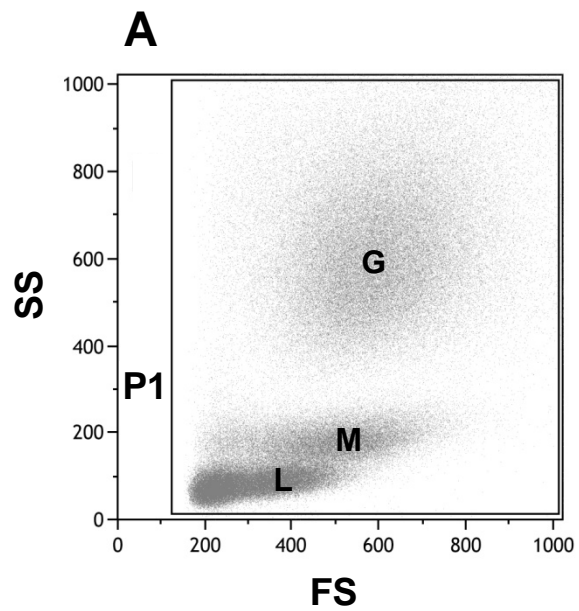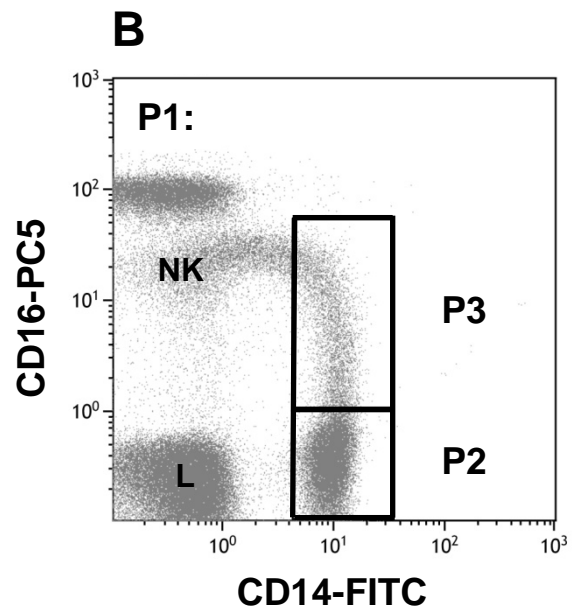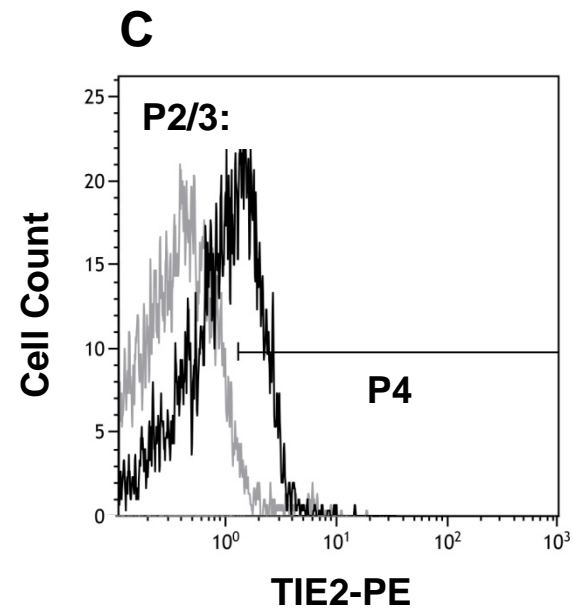

Supplement: MOESM1 [file 9736040]
